# Supplementary material for: How the luxR Gene Affects the Pathogenicity of Pseudomonas plecoglossicida and the Immune Response of Epinephelus coioides
Source: MDPI journal article supplement (doi:10.3390/fishes8100507), 2023-10-11
Supplement: s1 [file s1]

**Supplementary Table S1:** The sequences of four shRNAs for *luxR* gene

| Name                | shRNA Sequence (5'-3')                                                                                                               |
|---------------------|--------------------------------------------------------------------------------------------------------------------------------------|
| <i>luxR</i> -RNAi-1 | F:5'-CACCGCCTACCAAGGTTCTCGTATTTCAAGAGAAATACGAGAACCTTGGTAGGC-3'<br>R:5'-AAAAGCCTACCAAGGTTCTCGTATTTCTCTTGAAAATACGAGAACCTTGGTAGGC-3'    |
| <i>luxR</i> -RNAi-2 | F:5'-CACCGCCTGAATGAACTGATCAAGGTTCAAGAGACCTTGATCAGTTCATTCAGGC-3'<br>R:5'-AAAAGCCTGAATGAACTGATCAAGGTCTCTTGAACCTTGATCAGTTCATTCAGGC-3'   |
| <i>luxR</i> -RNAi-3 | F:5'-CACCGGCACTGGGTATGAGTAATAATTCAAGAGATTATTACTCATACCCAGTGCC-3'<br>R:5'-AAAAGGCACTGGGTATGAGTAATAATCTCTTGAATTATTACTCATACCCAGTGCC-3'   |
| <i>luxR</i> -RNAi-4 | F:5'-CACCGCTGAATCCATGCAAATTAGCTTCAAGAGAGCTAATTTGCATGGATTTCAGC-3'<br>R:5'-AAAAGCTGAATCCATGCAAATTAGCTCTCTTGAAGCTAATTTGCATGGATTTCAGC-3' |
