# Supplementary material for: How the luxR Gene Affects the Pathogenicity of Pseudomonas plecoglossicida and the Immune Response of Epinephelus coioides
Source: MDPI journal article supplement (doi:10.3390/fishes8100507), 2023-10-11
Supplement: s1 [file s1]

**Supplementary Table S2:** The sequence of Primers for PCR and qRT-PCR

| gene name                       | Base sequence (From 5' to 3')                                        |
|---------------------------------|----------------------------------------------------------------------|
| <i>gyrB</i>                     | F: 5'-TGCTGAAGGACGAGCGTTCG-3'<br>R: 5'-ATCATCTTGCCGACAACAGC-3'       |
| <i>luxR</i>                     | F: 5'- GCGGAAACGGATAATGGCTCA -3'<br>R: 5'-GCGGACAAGTTTGGGAAATAGGT-3' |
| <i>16S rDNA</i>                 | F: 5'-TTCATCGCCACTGCACCTG-3'<br>R: 5'- GTTCTTGCCCTTCTCCAC-3'         |
| <i>pcM130 / tac</i>             | F: 5'-CTTCCTGGTTGGCTTGGTTTC-3'<br>R: 5'-GGTG TTCCTTCTTCACTGTCCCT-3'  |
| <i><math>\beta</math>-actin</i> | F: 5'-GGCTACTCCTTCACCACCACA-3'<br>R: 5'-GGGCAACGGAACCTCTCAT-3'       |
